# Supplementary material
Source: PubMed Central journal article supplement (PMC3193431)
Supplement: cr2010144x1.pdf [file cr2010144x1.pdf]

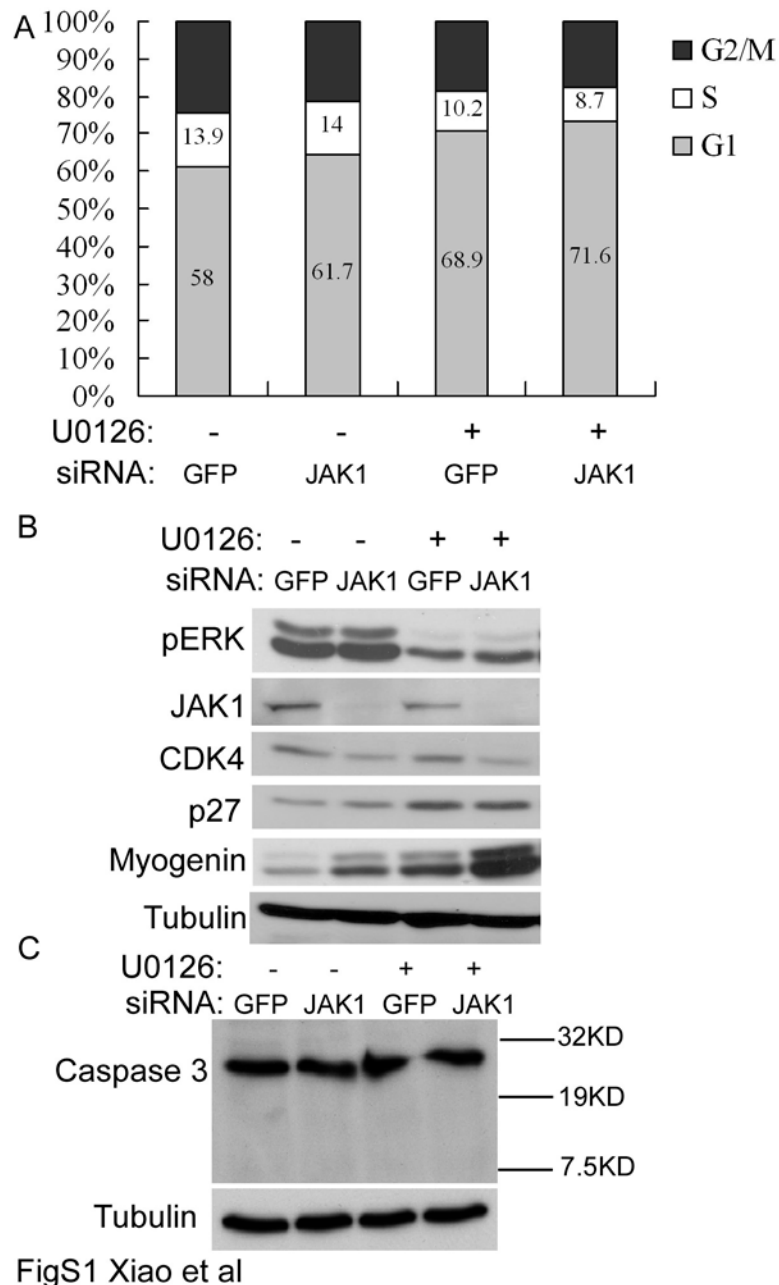

**Fig.S1. Simultaneous inhibition of JAK1 and ERK reduced myoblast proliferation (A, B, C).** C2C12 cells were firstly transfected with either GFP-siRNA or JAK1-siRNA. After 24h growth in growth medium, either DMSO or U0126 ( $10\mu\text{M}$ ) was added to the media for another 18h. In (A), cells were trypsinized, fixed, stained with propidium iodide and subjected to flow cytometry analysis. The percentage of cells in G1 and S phase was indicated in the bar chart. In (B,C), cells were harvested, and  $50\mu\text{g}$  of WCE were subjected to SDS-PAGE and Western blot analysis for the indicated cell cycle markers and Caspase 3.
