# Supplementary material
Source: PubMed Central journal article supplement (PMC3193431)
Supplement: cr2010144x2.pdf [file cr2010144x2.pdf]

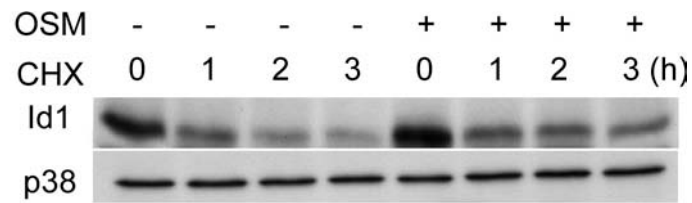

FigS2 Xiao et al

**Fig.S2. OSM treatment did not alter the stability of Id proteins.** C2C12 cells grown in GM were treated with or without 20ng/ml of OSM for 24 hours (h). Cells were harvested 0, 1, 2, or 3 hours after the addition of cycloheximide (CHX, 100  $\mu$ g/ml). 50  $\mu$ g of WCE were subjected to SDS-PAGE and Western blot analysis for Id1 and total p38 (loading control).
