# Supplementary material
Source: PubMed Central journal article supplement (PMC3193431)
Supplement: cr2010144x3.pdf [file cr2010144x3.pdf]

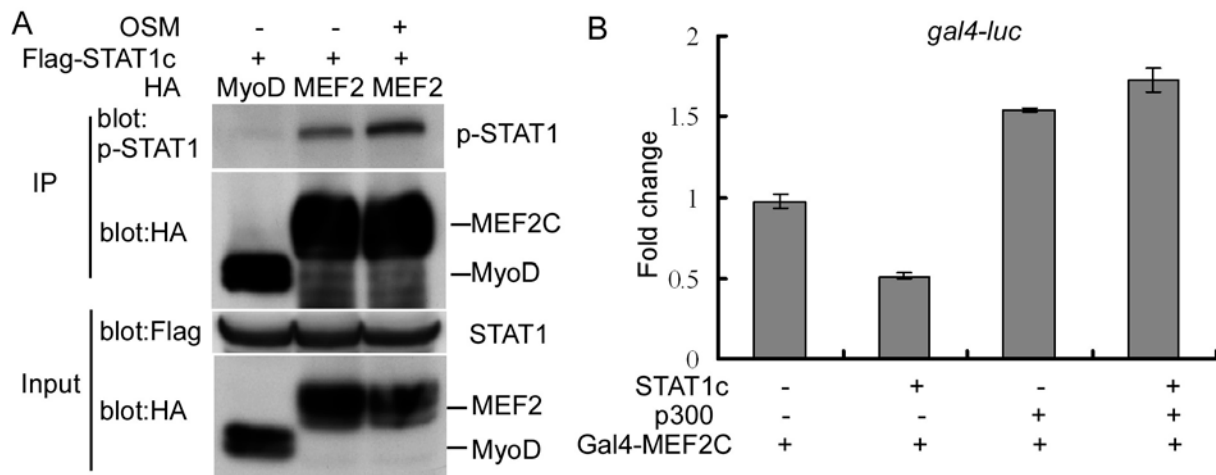

FigS3 Xiao et al

**Fig.S3. STAT1 interacted with and repressed MEF2** (A). C2C12 cells were co-transfected with vectors encoding Flag-STAT1c together with HA-MyoD or HA-MEF2C with or without OSM (20 ng/ml) treatment. HA-MyoD/or HA-MEF2C was immunoprecipitated from WCE. The immunoprecipitates were then subjected to SDS-PAGE and Western blot analysis for phosphor-STAT1. MyoD was used as negative control here. (B). C2C12 cells were transfected in triplicate with *gal4-luc* together with vectors encoding Gal4-MEF2C, STAT1c and p300 in different combinations as indicated. 24 h after transfection, cells were induced to differentiate in DM for another 24 h. WCE was subjected to luciferase assays. Fold change was calculated as the ratio of the luciferase activity in cells expressing STAT1c, p300 or both over that in cells without them. The results were shown as the mean  $\pm$  S.D.
